# Supplementary material for: Integration of semi-empirical MS/MS library with characteristic features for the annotation of novel amino acid-conjugated bile acids
Source: Royal Society of Chemistry journal article supplement (doi:10.1039/d3an01237a), 2023-01-01

## Supporting Information (Figures)

### **Integration of semi-empirical MS/MS library with characteristic features for annotation of novel amino acid conjugated bile acids**

Yan Ma<sup>1,2§</sup>, Cao Yang<sup>1</sup>, Song Xiaocui<sup>1</sup>, Weichen Xu<sup>3</sup>, Zichen Luo<sup>3</sup>, Jinjun Shan<sup>3</sup>, Jingjie Zhou<sup>4</sup>

<sup>1</sup>National Institute of Biological Sciences, Beijing, Beijing 102206, China.

<sup>2</sup>Tsinghua Institute of Multidisciplinary Biomedical Research, Tsinghua University, Beijing 100084, China.

<sup>3</sup>Institute of Pediatrics, Jiangsu Key Laboratory of Pediatric Respiratory Disease, Medical Metabolomics Center, Nanjing University of Chinese Medicine, Nanjing 210023, China

<sup>4</sup>The Affiliated Jiangyin Hospital of Nanjing University of Chinese Medicine, Jiangyin 214400, China

§Corresponding author (Email: [mayan@nibs.ac.cn](mailto:mayan@nibs.ac.cn))

## Table of Content

|                                                                                                  |         |
|--------------------------------------------------------------------------------------------------|---------|
| Figure S1. MS intensities of amino acid conjugated bile acids in negative and positive mode..... | Page S2 |
| Figure S2. MS/MS spectra of cysteine conjugated bile acids in negative mode.....                 | Page S3 |
| Figure S3. Workflow of semi-empirical library development in negative mode.....                  | Page S4 |
| Figure S4. MS/MS spectra of amino acid conjugated cholic acid in positive mode.....              | Page S5 |

**Figure S1. Comparison of MS intensities of amino acid conjugated lithocholic acid (LCA), deoxycholic acid (DCA) and cholic acid (CA) in negative and positive mode, normalized to the intensity of negative mode.**

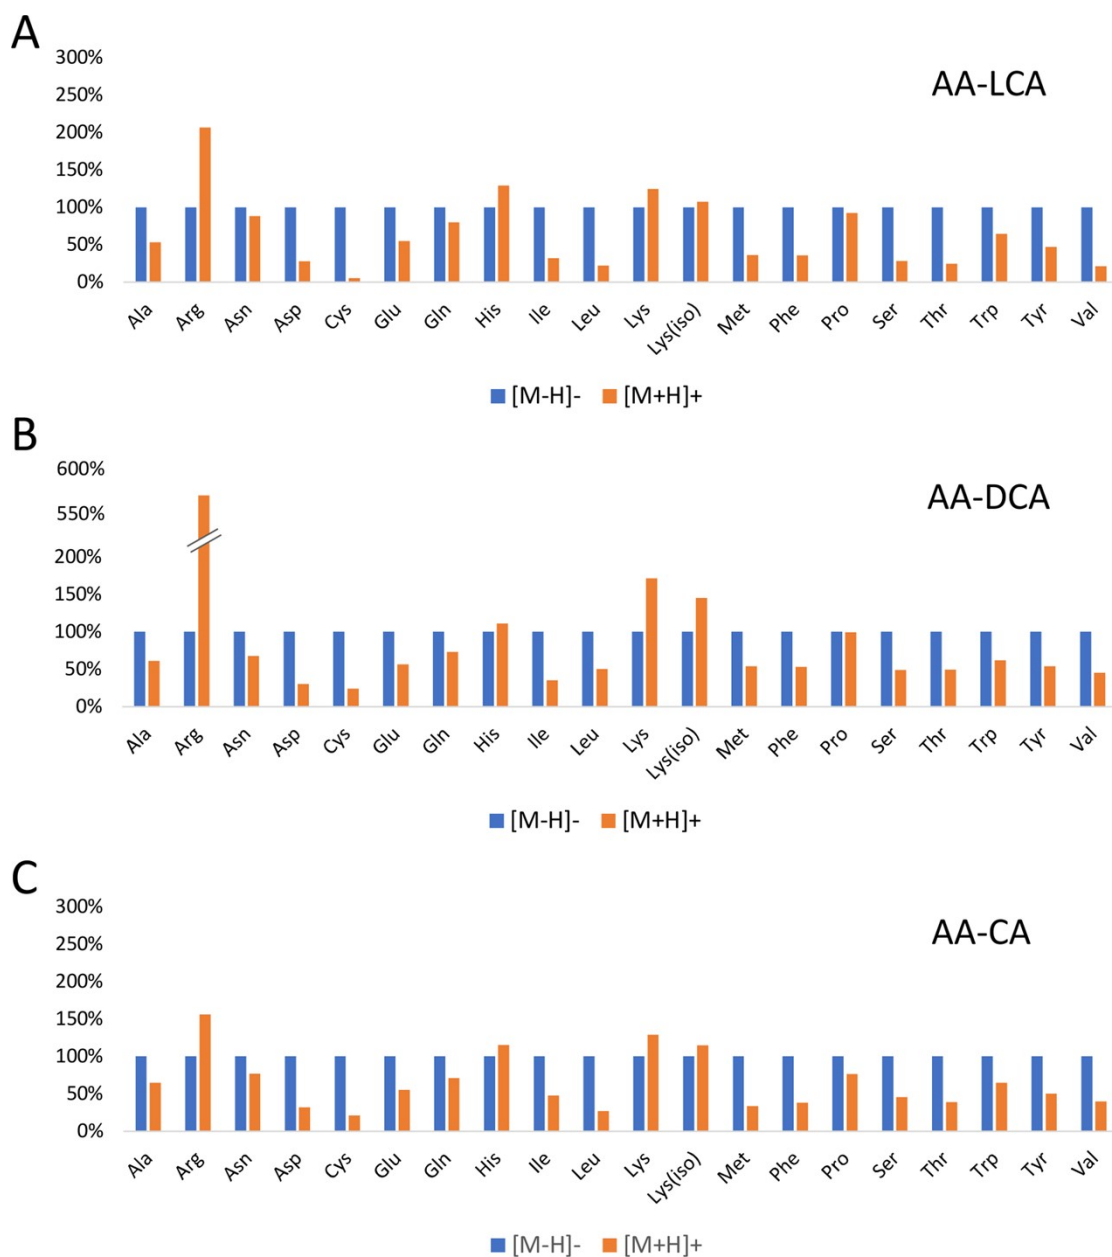

**Figure S2. MS/MS spectra of cysteine conjugated lithocholic acid (LCA), deoxycholic acid (DCA) and cholic acid (CA) in negative mode.**

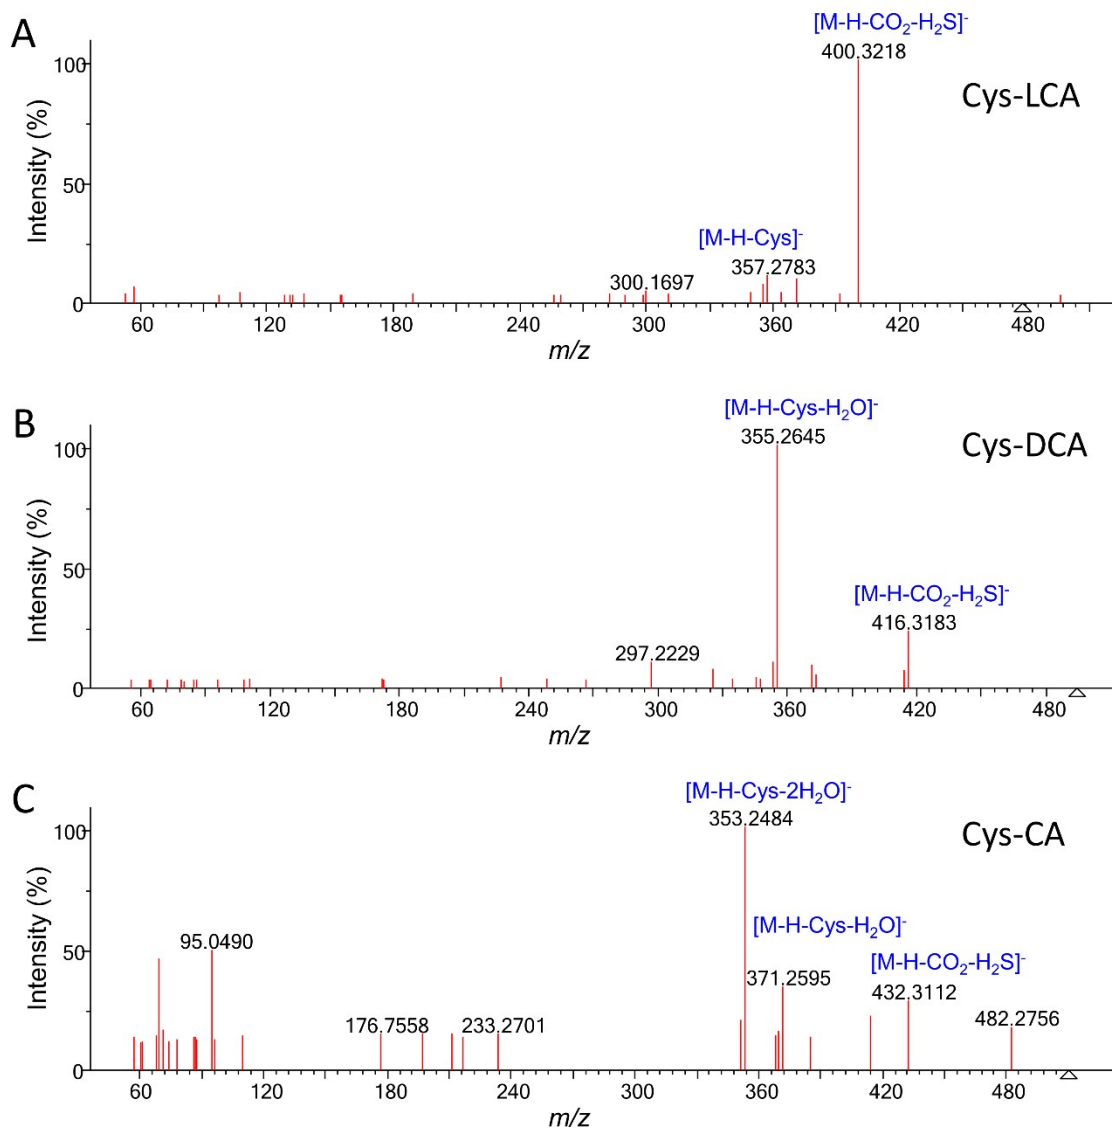

**Figure S3. Workflow of semi-empirical library development in negative mode.**

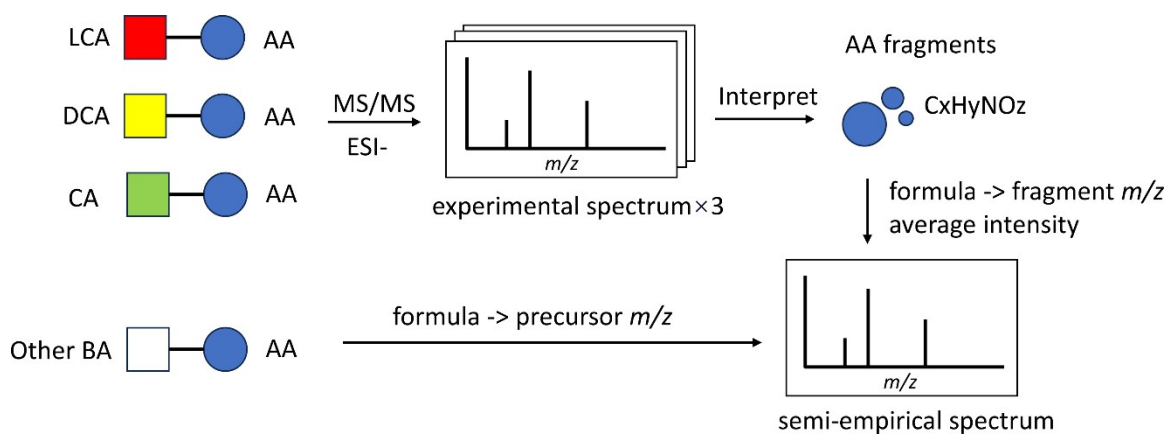

**Figure S3: MS/MS spectra of amino acid conjugated cholic acid (CA) in positive mode, compared with MS/MS spectra of unconjugated CA.**

$m/z$  of amino acid-related fragments are labeled. Triangles on the  $m/z$  axis show the positions of precursors.

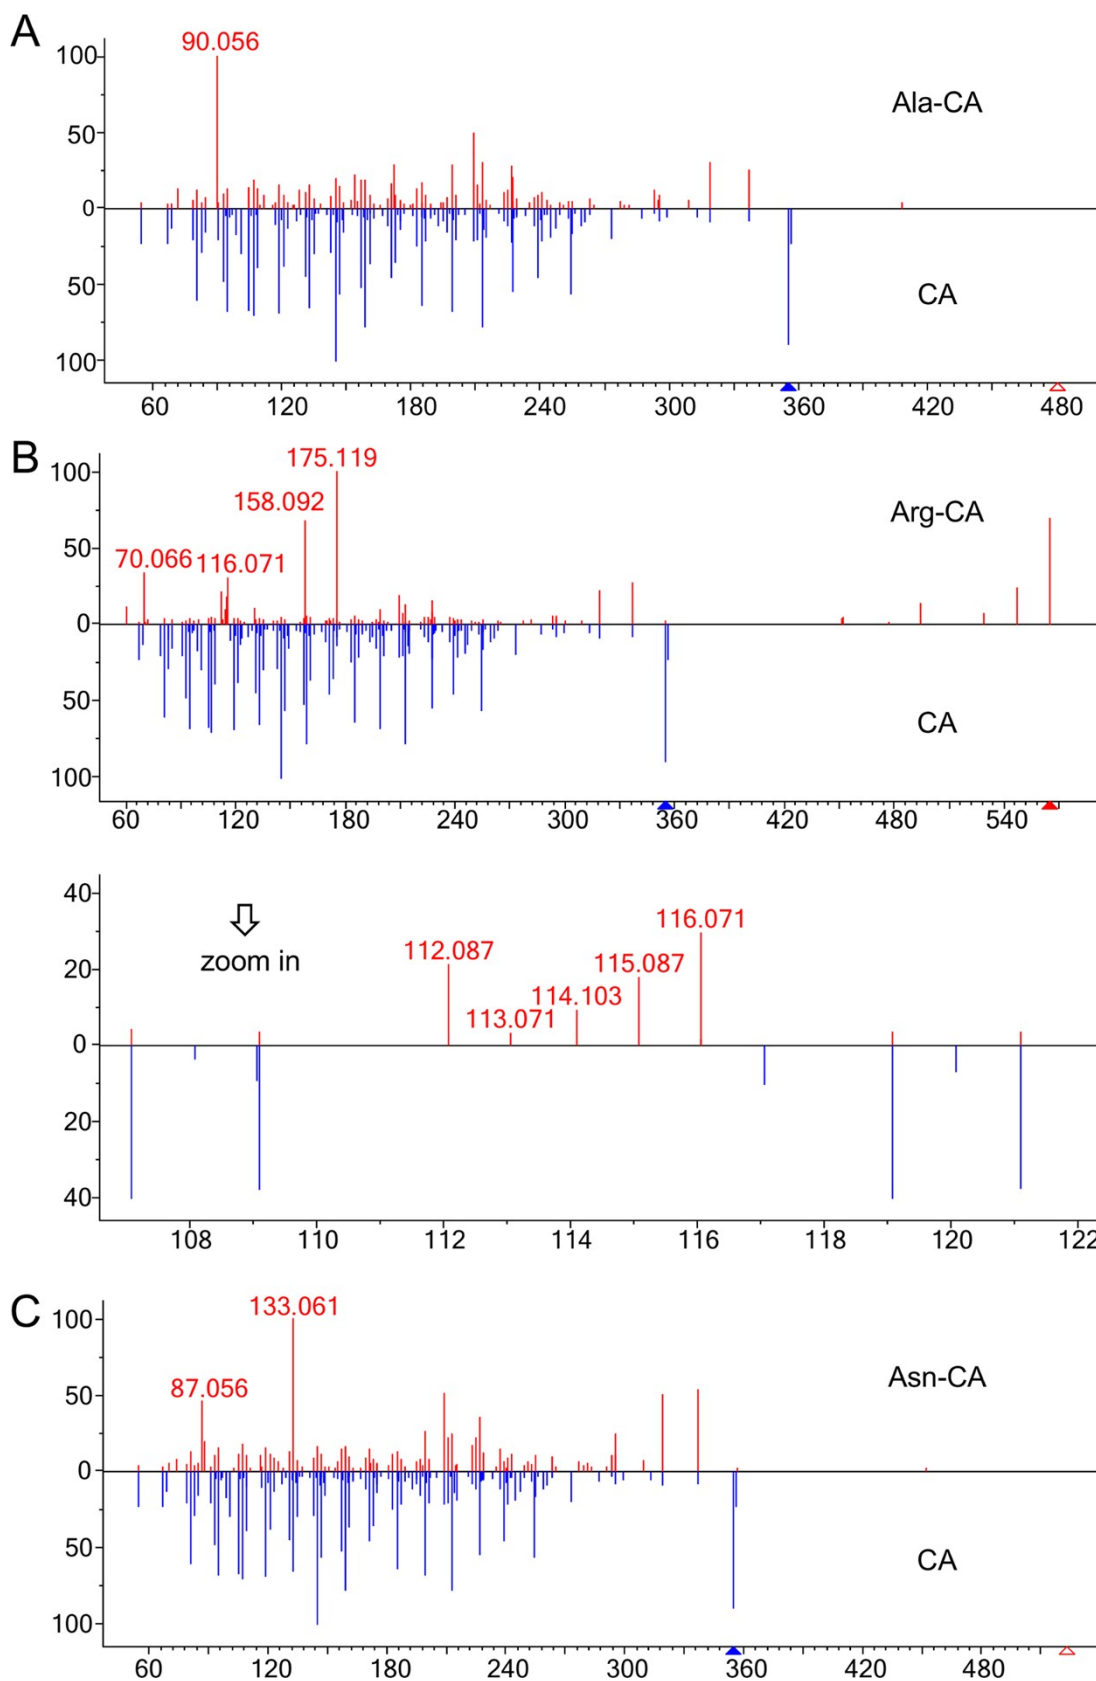

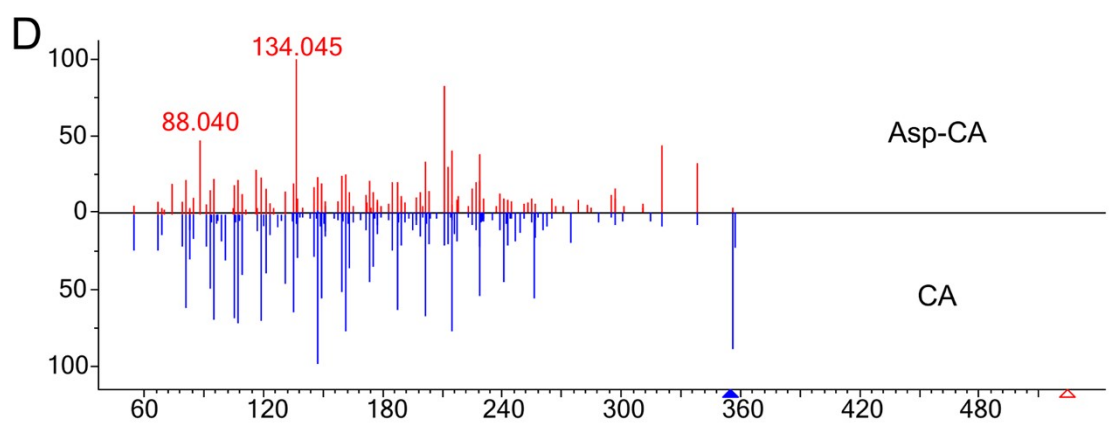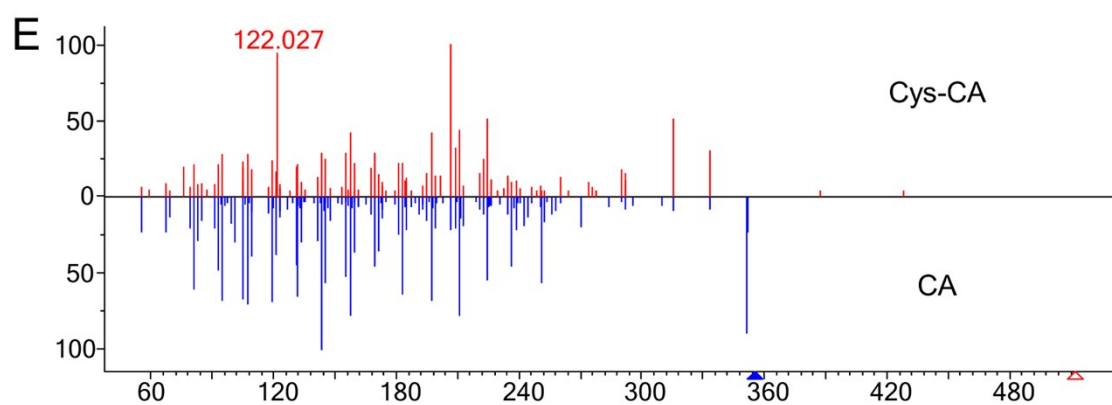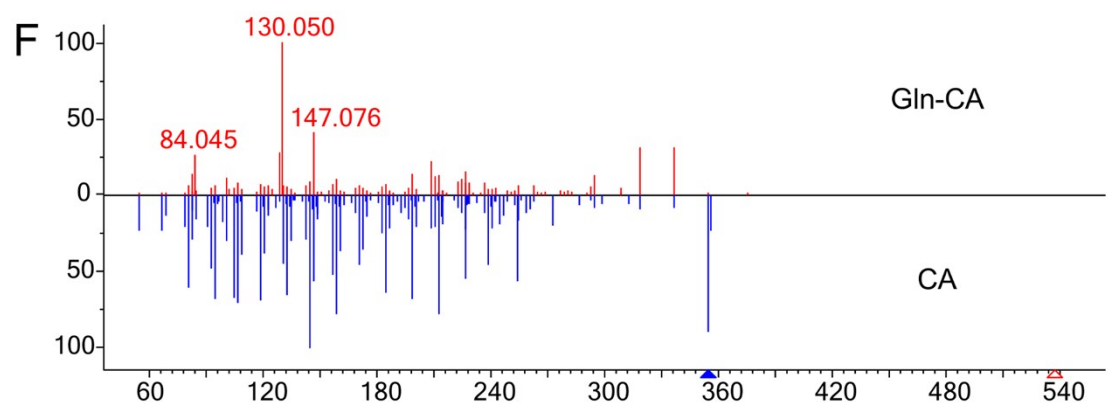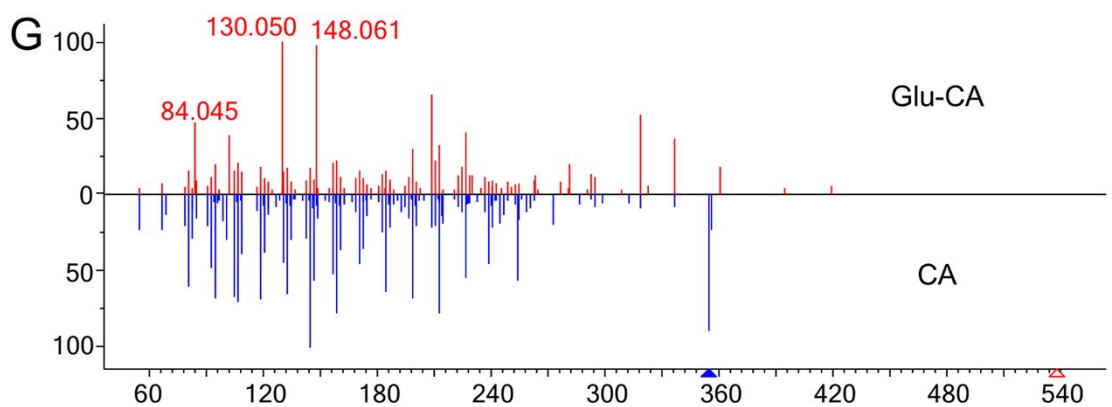

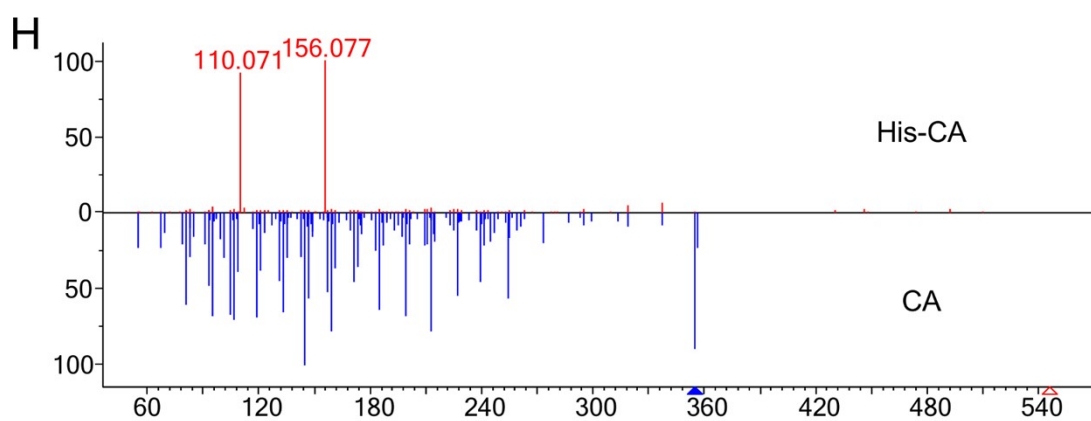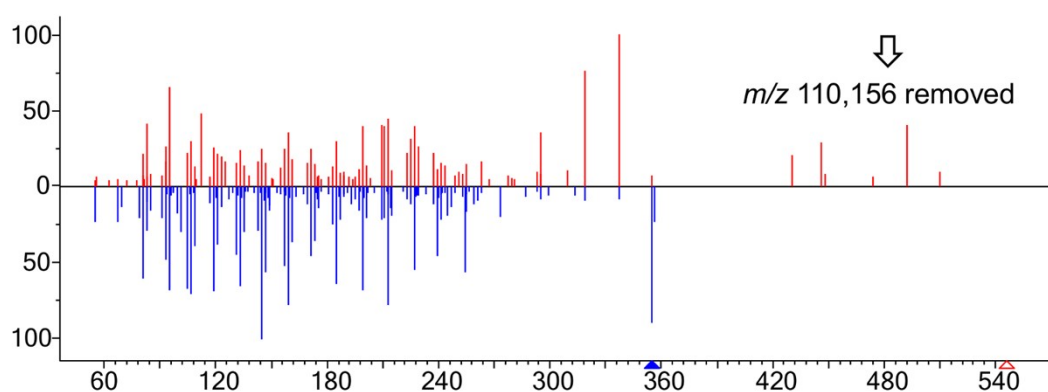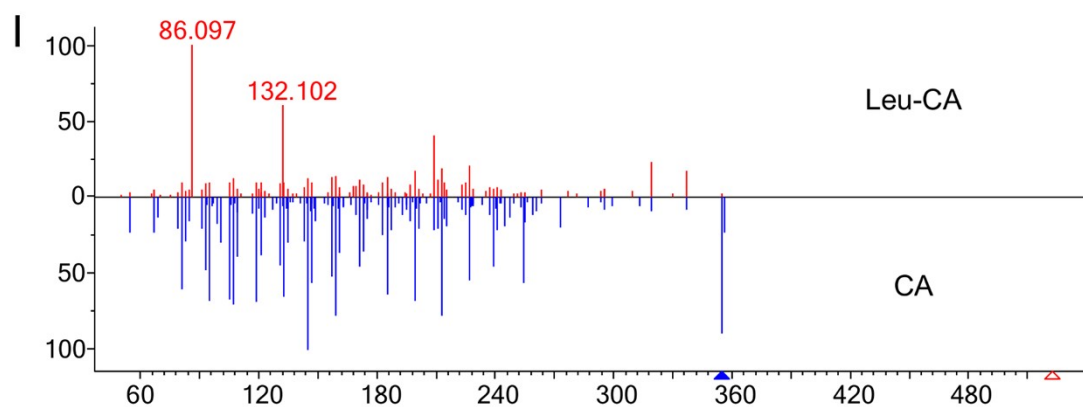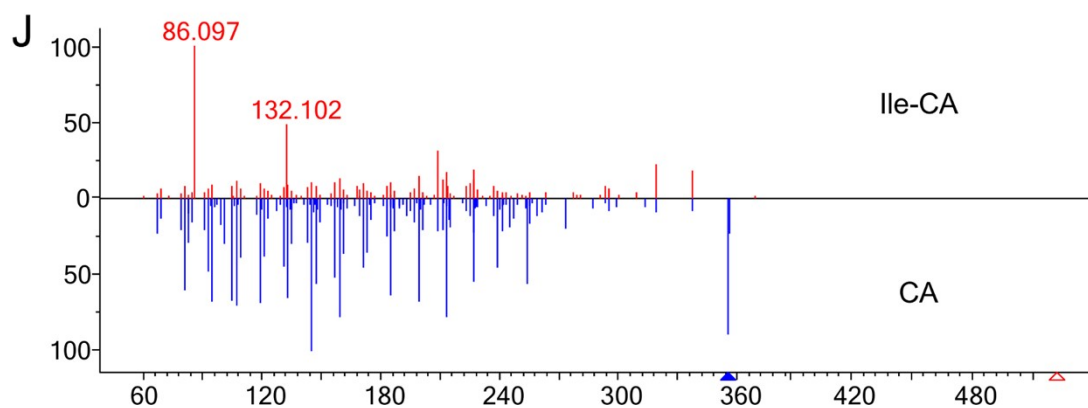

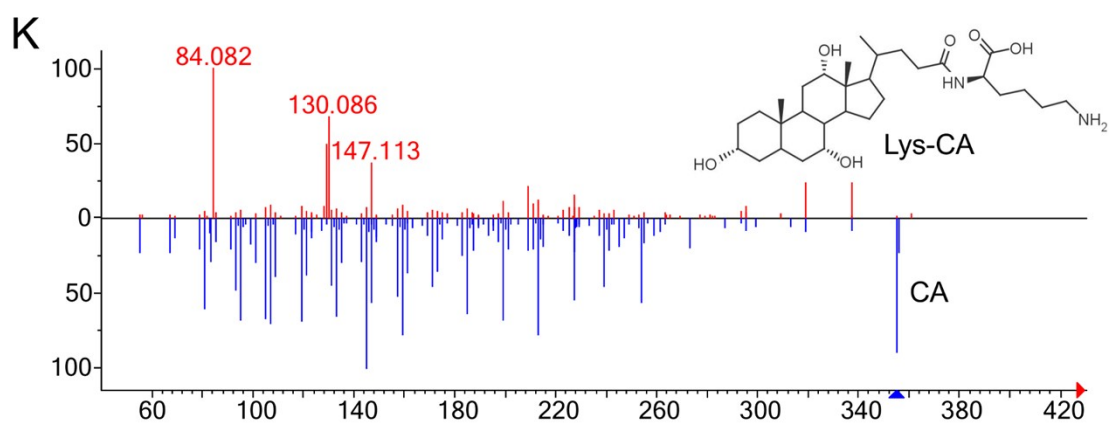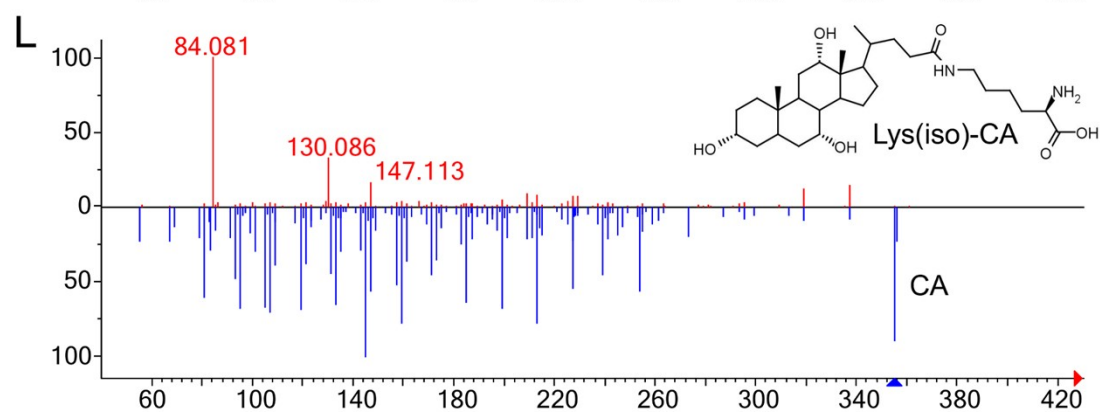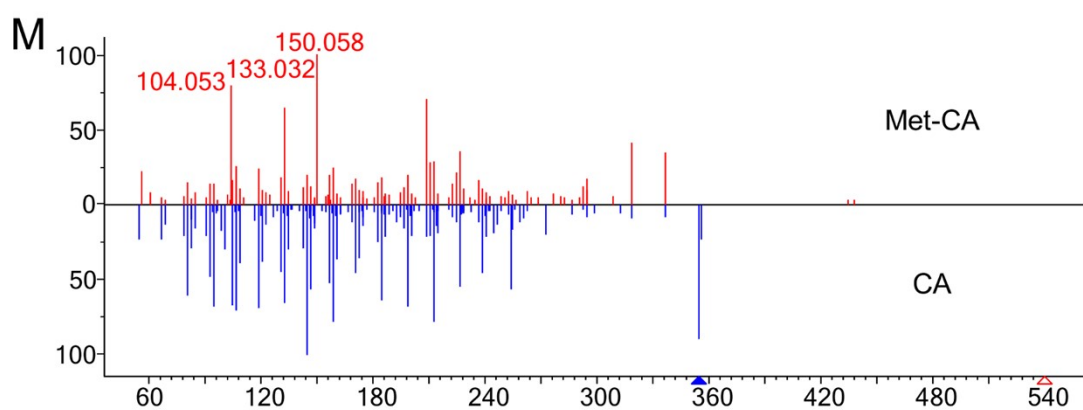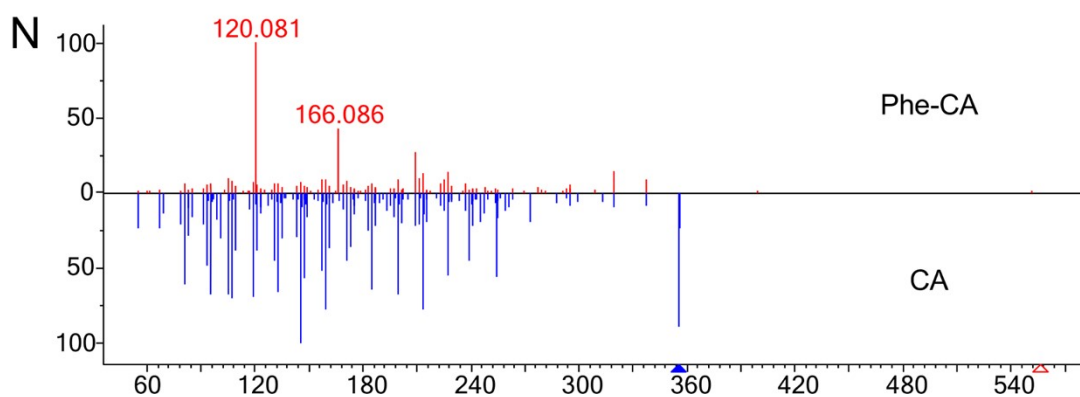



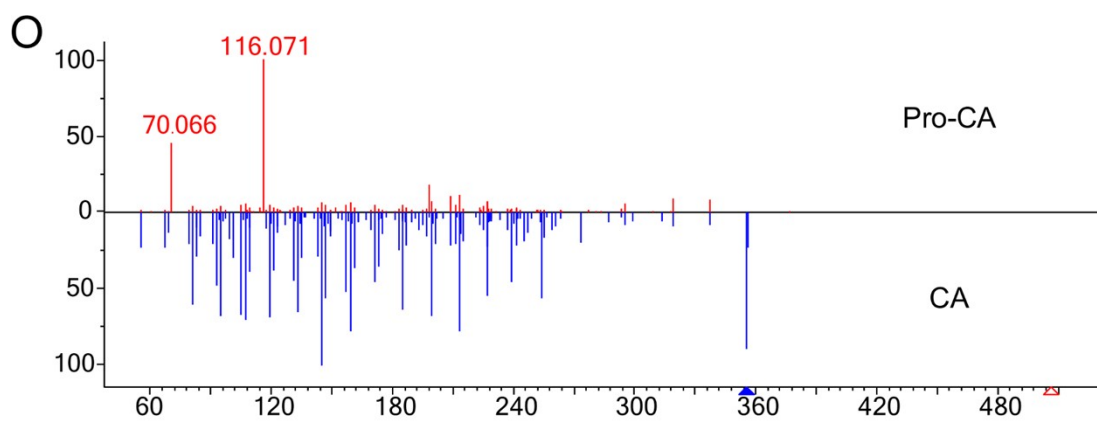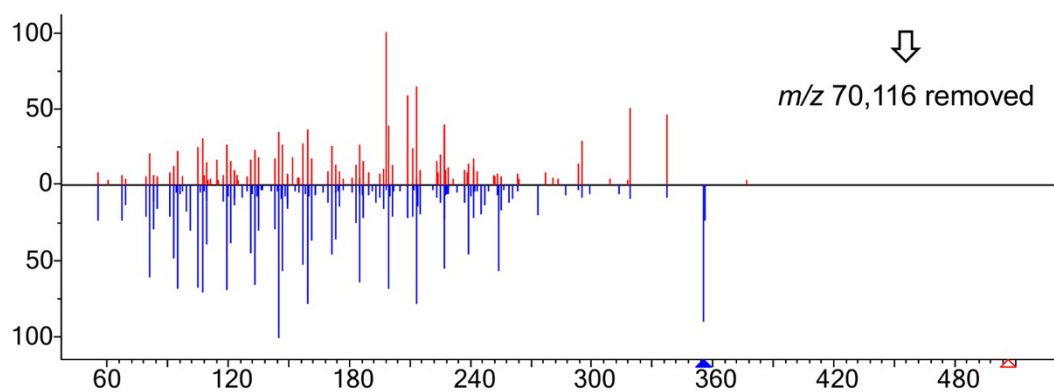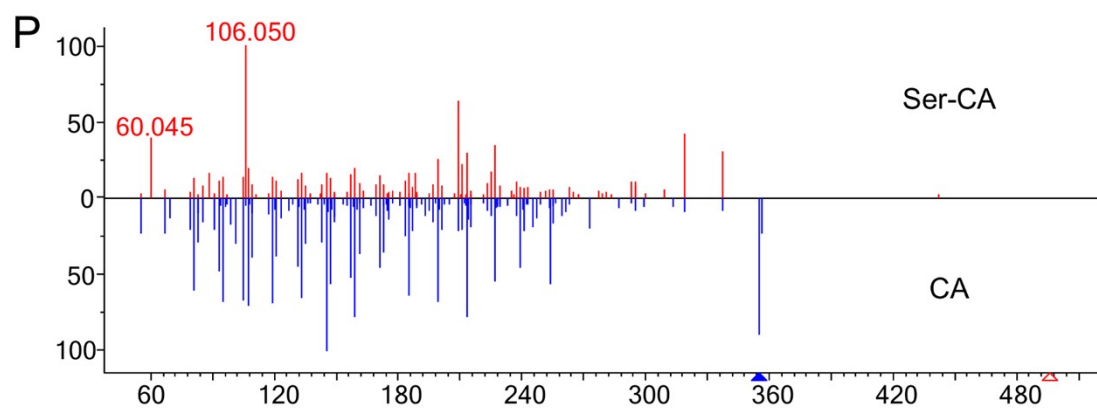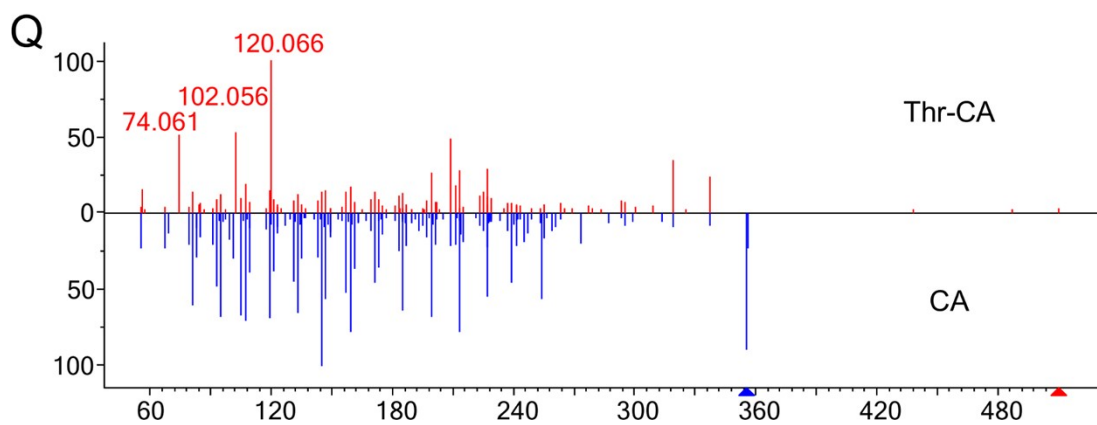

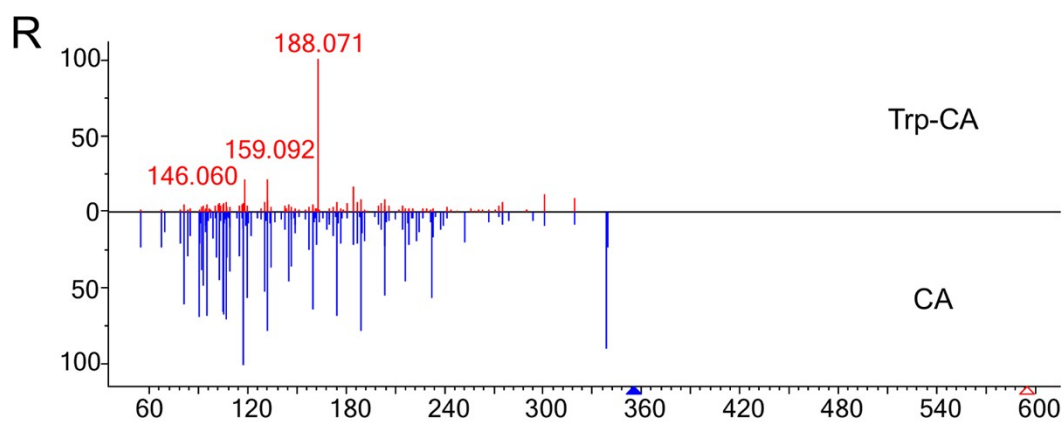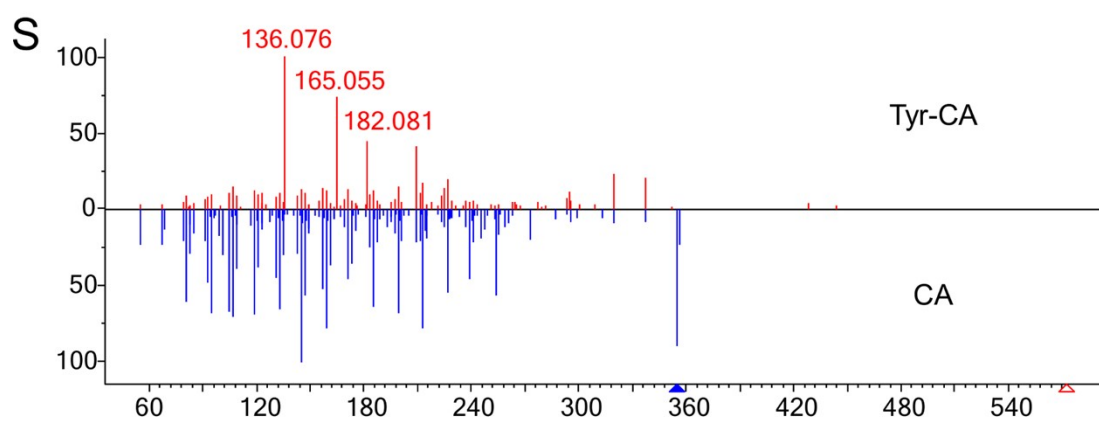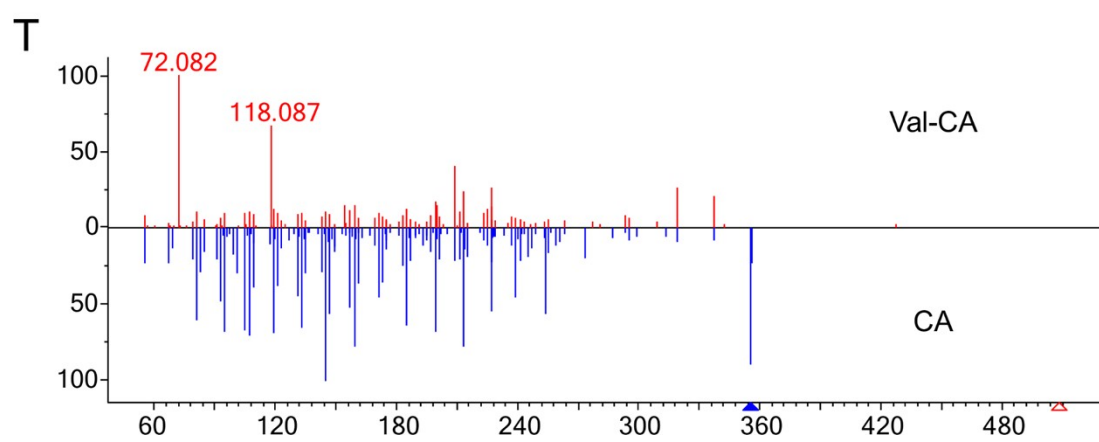

Supplement: d3an01237a1.pdf [file d3an01237a1.pdf]
