# Supplementary material for: Integration of semi-empirical MS/MS library with characteristic features for the annotation of novel amino acid-conjugated bile acids
Source: Royal Society of Chemistry journal article supplement (doi:10.1039/d3an01237a), 2023-01-01
Supplement: d3an01237a2.xlsx [file d3an01237a2.xlsx]

## Sheet: title page
Note: This file is provided in Excel format.
Supporting Information (Tables)
Integration of semi-empirical MS/MS library with characteristic features for annotation of novel amino acid conjugated bile acids
Yan Ma1,2§, Cao Yang1, Song Xiaocui1, Weichen Xu3, Zichen Luo3, Jinjun Shan3, Jingjie Zhou4
1National Institute of Biological Sciences, Beijing, Beijing 102206, China.
2Tsinghua Institute of Multidisciplinary Biomedical Research, Tsinghua University, Beijing 100084, China.
3Institute of Pediatrics, Jiangsu Key Laboratory of Pediatric Respiratory Disease, Medical Metabolomics Center, Nanjing University of Chinese Medicine, Nanjing 210023, China
4The Affiliated Jiangyin Hospital of Nanjing University of Chinese Medicine, Jiangyin 214400, China
*Corresponding author (Email: mayan@nibs.ac.cn)
Table of Content
Table S1. Characteristic product ions of amino acid conjugated bile acids in negative mode
Table S2. Characteristic product ions of amino acid conjugated bile acids in positive mode
Table S3. Identification of the synthesized compounds in negative mode using semi-empirical library
Table S4. Amino acid conjugated bile acids detected in human, dog and rat fecal samples

## Sheet: S1
Table S1.Characteristic product ions of amino acid conjugated bile acids in negative mode
amino acid	[M-H]-	formula(neutral)	comment	relative abudance
Ala	88.0404	C3H7O2N	Ala	100
Asp	88.0404	C3H7O2N	Asp-CO2	100
Asp	71.0138	C3H4O2	Asp-CH3NO2	25
Asp	115.004	C4H4O4	Asp-NH3	15
Glu	102.056	C4H9O2N	Glu-CO2	100
Glu	128.035	C5H7O3N	Glu-H2O	80
Glu	146.046	C5H9O4N	Glu	10
Glu	84.0455	C4H7O1N	Glu-CH2O3	10
Phe	147.045	C9H8O2	Phe-NH3	95
Phe	164.072	C9H11O2N	Phe	95
Phe	72.0091	C2H3O2N	Phe-C7H8	30
His	110.072	C5H9N3	His-CO2	100
His	154.062	C6H9O2N3	His	55
His	93.0458	C5H6N2	His-CH3NO2	15
His	137.036	C6H6O2N2	His-NH3	10
Leu/Ile	130.087	C6H13O2N	Leu/Ile	100
Lys	145.098	C6H14O2N2	Lys	100
Met	148.044	C5H11O2NS	Met	100
Asn	96.0091	C4H3O2N	Asn-H2O-NH3	95
Asn	114.02	C4H5O3N	Asn-NH3	70
Asn	70.0298	C3H5O1N	Asn-CH3NO2	60
Asn	113.036	C4H6O2N2	Asn-H2O	50
Asn	131.046	C4H8O3N2	Asn	40
Pro	114.056	C5H9O2N	Pro	100
Gln	127.051	C5H8O2N2	Gln-H2O	100
Gln	145.062	C5H10O3N2	Gln	85
Gln	109.041	C5H6ON2	Gln-H4O2	40
Gln	128.035	C5H7O3N	Gln-NH3	30
Gln	101.072	C4H10ON2	Gln-CO2	20
Gln	84.0455	C4H7O1N	Gln-CH3NO2	20
Arg	131.083	C5H12O2N2	Arg-CH2N2	100
Ser	74.0247	C2H5O2N	Ser-CH2O	100
Ser	104.035	C3H7O3N	Ser	20
Thr	74.0247	C2H5O2N	Thr-C2H4O	100
Val	116.072	C5H11O2N	Val	100
Trp	74.0247	C2H5O2N	Trp-C9H7N	100
Trp	116.051	C8H7N	Trp-C3H5NO2	80
Trp	142.066	C10H9N	Trp-CH3NO2	30
Trp	203.083	C11H12O2N2	Trp	30
Trp	72.0091	C2H3O2N	Trp-C9H9N	10
Trp	159.093	C10H12N2	Trp-CO2	15
Tyr	180.067	C9H11O3N	Tyr	90
Tyr	119.05	C8H8O	Tyr-CH3NO2	75
Tyr	163.04	C9H8O3	Tyr-NH3	60
Tyr	93.0346	C6H6O	Tyr-C3H5NO2	20
Tyr	72.0091	C2H3O2N	Tyr-C7H8O	15
Tyr	74.0247	C2H5O2N	Tyr-C7H6O	15
Tyr	107.05	C7H8O	Tyr-C2H3NO2	15

## Sheet: S2
Table S2.Characteristic product ions of amino acid conjugated bile acids in positive mode
amino acid	[M+H]+	formula (neutral)	comment
Ala	90.055	C3H7NO2	Ala
Arg	60.0556	CH5N3
Arg	70.0651	C4H7N
Arg	112.087	C5H9N3
Arg	113.071	C5H8N2O
Arg	114.103	C5H11N3
Arg	115.087	C5H10N2O
Arg	116.071	C5H9NO2
Arg	158.092	C6H11N3O2	Arg-NH3
Arg	175.119	C6H14N4O2	Arg
Asn	87.0553	C3H6N2O	Asn-CH2O2
Asn	133.061	C4H8N2O3	Asn
Asp	88.0393	C3H5NO2	Asp-CH2O2
Asp	134.045	C4H7NO4	Asp
Cys	122.027	C3H7NO2S	Cys
Gln	84.0444	C4H5NO	C4H5NO
Gln	129.066	C5H8NO2	Gln-H2O
Gln	130.05	C5H10NO3	Gln-NH3
Gln	147.076	C5H10N2O3	Gln
Glu	84.0444	C4H5NO	C4H5NO
Glu	130.05	C5H7NO3	Glu-H2O
Glu	148.06	C5H9NO4	Glu
His	110.071	C5H7N3	His-CH2O2
His	156.077	C6H9N3O2	His
Leu/Ile	86.0964	C5H11N	Leu/Ile-CH2O2
Leu/Ile	132.102	C6H13NO2	Leu/Ile
Lys	84.0808	C5H9N	C5H9N
Lys	129.102	C6H12ON2	Lys-H2O
Lys	130.086	C6H11NO2	Lys-NH3
Lys	147.113	C6H14O2N2	Lys
Met	104.053	C4H9NS	Met-CH2O2
Met	133.032	C5H8O2S	Met-NH3
Met	150.058	C5H11NO2S	Met
Phe	120.081	C8H9N	Phe-CH2O2
Phe	166.086	C9H11NO2	Phe
Pro	70.0651	C4H7N	Pro-CH2O2
Pro	116.071	C5H9NO2	Pro
Ser	60.0444	C2H5NO	Ser-CH2O2
Ser	106.05	C3H7NO3	Ser
Thr	74.0601	C3H7NO	Thr-CH2O2
Thr	102.055	C4H7NO2	Thr-H2O
Thr	120.066	C4H9NO3	Thr
Trp	146.06	C9H7NO
Trp	159.092	C10H10N2	Trp-CH2O2
Trp	188.071	C11H9NO2	Trp-NH3
Tyr	136.076	C8H9NO	Tyr-CH2O2
Tyr	165.055	C9H8O3	Tyr-NH3
Tyr	182.081	C9H11NO3	Tyr
Val	72.0808	C4H9N	Val-CH2O2
Val	118.086	C5H11NO2	Val

## Sheet: S3
Table S3. Identification of the synthesized compounds in negative mode using semi-empirical library
Synthesized	library predicted from AABA of	Identifed	Dot Product
Ala-CA	LCA+DCA	3OH_Ala-BA	684
Asp-CA	LCA+DCA	3OH_Asp-BA	788
Glu-CA	LCA+DCA	3OH_Glu-BA	834
His-CA	LCA+DCA	3OH_His-BA	887
Ile-CA	LCA+DCA	3OH_Leu/Ile-BA	885
Asn-CA	LCA+DCA	3OH_Asn-BA	858
Gln-CA	LCA+DCA	3OH_Gln-BA	818
Arg-CA	LCA+DCA	3OH_Arg-BA	848
Phe-CA	LCA+DCA	3OH_Phe-BA	723
Lys-CA	LCA+DCA	3OH_Lys-BA	857
Leu-CA	LCA+DCA	3OH_Leu/Ile-BA	915
Met-CA	LCA+DCA	3OH_Met-BA	468
Pro-CA	LCA+DCA	3OH_Pro-BA	917
Ser-CA	LCA+DCA	3OH_Ser-BA	832
Thr-CA	LCA+DCA	3OH_Thr-BA	862
Val-CA	LCA+DCA	3OH_Val-BA	909
Trp-CA	LCA+DCA	3OH_Trp-BA	799
Tyr-CA	LCA+DCA	3OH_Tyr-BA	909
Ala-LCA	DCA+CA	1OH_Ala-BA	705
Asp-LCA	DCA+CA	1OH_Asp-BA	789
Glu-LCA	DCA+CA	1OH_Glu-BA	855
His-LCA	DCA+CA	1OH_His-BA	902
Ile-LCA	DCA+CA	1OH_Leu/Ile-BA	924
Asn-LCA	DCA+CA	1OH_Asn-BA	758
Gln-LCA	DCA+CA	1OH_Gln-BA	755
Arg-LCA	DCA+CA	1OH_Arg-BA	778
Phe-LCA	DCA+CA	1OH_Phe-BA	822
Lys-LCA	DCA+CA	1OH_Lys-BA	923
Leu-LCA	DCA+CA	1OH_Leu/Ile-BA	919
Met-LCA	DCA+CA	1OH_Met-BA	492
Pro-LCA	DCA+CA	1OH_Pro-BA	954
Ser-LCA	DCA+CA	1OH_Ser-BA	759
Thr-LCA	DCA+CA	1OH_Thr-BA	829
Val-LCA	DCA+CA	1OH_Val-BA	932
Trp-LCA	DCA+CA	1OH_Trp-BA	899
Tyr-LCA	DCA+CA	1OH_Tyr-BA	866
Ala-DCA	LCA+CA	2OH_Ala-BA	723
Asp-DCA	LCA+CA	2OH_Asp-BA	855
Glu-DCA	LCA+CA	2OH_Glu-BA	853
Phe-DCA	LCA+CA	2OH_Phe-BA	912
His-DCA	LCA+CA	2OH_His-BA	890
Ile-DCA	LCA+CA	2OH_Leu/Ile-BA	921
Lys-DCA	LCA+CA	2OH_Lys-BA	936
Leu-DCA	LCA+CA	2OH_Leu/Ile-BA	933
Met-DCA	LCA+CA	2OH_Met-BA	578
Asn-DCA	LCA+CA	2OH_Asn-BA	886
Pro-DCA	LCA+CA	2OH_Pro-BA	939
Gln-DCA	LCA+CA	2OH_Gln-BA	814
Arg-DCA	LCA+CA	2OH_Arg-BA	853
Ser-DCA	LCA+CA	2OH_Ser-BA	820
Thr-DCA	LCA+CA	2OH_Thr-BA	858
Val-DCA	LCA+CA	2OH_Val-BA	937
Trp-DCA	LCA+CA	2OH_Trp-BA	829
Tyr-DCA	LCA+CA	2OH_Tyr-BA	858

## Sheet: S4
Table S4. Amino acid conjugated bile acids detected in human, dog and rat fecal samples.
confidence level L3: annotated in both positive and negative mode.
confidence level L4: annotated in negative mode only.					peak intensities
RT(min)	[M-H]-	annotation	level	synthesized compound	Human-1	Human-2	Dog-1	Dog-2	Rat-1	Rat-2
10.29	460.307	1O1OH_Ala-BA	L4	β-Ala-12o-DCA	3.52764e+06	3.41191e+06	6.23531e+06	4.24347e+06	0	1.62531e+06
8.04	460.307	1O1OH_Ala-BA	L4		329082	0	1.16919e+06	785801	0	0
7.09	476.302	1O2OH_Ala-BA	L4		0	316193	2.758e+06	1.86971e+06	6.96887e+06	0
7.36	476.302	1O2OH_Ala-BA	L4	β-Ala-7o-CA	0	0	0	0	3.44732e+07	2.89295e+07
13.63	446.328	1OH_Ala-BA	L4		3.33234e+06	3.3133e+06	3.15458e+06	2.79851e+06	6.02328e+06	6.01183e+06
12.46	446.327	1OH_Ala-BA	L4		919779	808062	690469	355843	1.56789e+06	1.67419e+06
13.72	446.328	1OH_Ala-BA	L4		2.44973e+06	2.57234e+06	663185	0	6.8209e+06	6.60147e+06
10.14	458.29	2O_Ala-BA	L4		0	0	1.26294e+06	851955	0	0
9.89	462.321	2OH_Ala-BA	L4	β-Ala-HDCA	6.74319e+06	6.60073e+06	7.39708e+06	6.17505e+06	2.53799e+07	2.64358e+07
12.18	462.322	2OH_Ala-BA	L4	Ala-DCA	1.36538e+06	0	2.00608e+06	1.44818e+06	4.99706e+06	5.55543e+06
11.69	462.323	2OH_Ala-BA	L4	β-Ala-DCA	1.81388e+07	1.68885e+07	3.48182e+07	3.39888e+07	0	0
11.76	462.323	2OH_Ala-BA	L3		1.3447e+07	1.28536e+07	1.45453e+07	0	1.84433e+07	0
9.42	462.323	2OH_Ala-BA	L4		0	0	277945	187409	1.43294e+07	1.4448e+07
11.29	462.323	2OH_Ala-BA	L4	Ala-CDCA	0	0	3.03431e+06	2.29943e+06	0	0
9.05	462.323	2OH_Ala-BA	L4		0	0	0	0	6.50072e+06	6.6344e+06
7.14	478.314	3OH_Ala-BA	L4	β-Ala-α-MCA	3.08775e+06	3.10909e+06	947925	712535	4.69886e+07	4.61283e+07
9.45	478.317	3OH_Ala-BA	L4		576609	672364	5.96552e+06	3.95776e+06	0	0
9.2	478.318	3OH_Ala-BA	L4	β-Ala-CA	0	0	1.07555e+07	7.14226e+06	0	0
6.95	478.318	3OH_Ala-BA	L4	β-Ala-β-MCA	0	0	0	0	1.91487e+07	1.9483e+07
5.95	478.318	3OH_Ala-BA	L4		0	0	650909	645825	0	0
5.89	478.318	3OH_Ala-BA	L4		0	0	0	0	3.76578e+07	3.70255e+07
6.72	478.318	3OH_Ala-BA	L4		0	0	0	0	2.6747e+07	2.76809e+07
5.53	478.318	3OH_Ala-BA	L4		0	0	0	0	3.3948e+07	3.23183e+07
6.57	478.318	3OH_Ala-BA	L4	β-Ala-ω-MCA	0	0	0	0	3.73813e+07	3.77007e+07
12.09	531.392	1OH_Arg-BA	L4	Arg-LCA	2.90489e+06	2.64049e+06	0	0	0	0
10.45	547.387	2OH_Arg-BA	L4	Arg-DCA	7.76653e+06	7.25459e+06	1.19171e+07	8.40709e+06	1.25055e+07	1.31659e+07
7.06	547.387	2OH_Arg-BA	L4		0	0	0	0	6.18136e+06	6.36907e+06
7.4	563.382	3OH_Arg-BA	L3	Arg-CA	425465	380055	4.77851e+06	3.35072e+06	1.10308e+06	0
4.04	563.382	3OH_Arg-BA	L4		0	0	0	0	9.39366e+06	9.25249e+06
3.76	563.382	3OH_Arg-BA	L4	Arg-ω-MCA	0	0	0	0	2.0339e+07	2.06397e+07
7.96	503.314	1O1OH_Asn-BA	L3		0	0	2.67116e+06	1.51948e+06	0	0
4.48	519.308	1O2OH_Asn-BA	L3		0	0	2.42345e+06	2.63637e+06	0	0
10.28	505.329	2OH_Asn-BA	L3	Asn-DCA	0	0	2.73834e+07	1.83492e+07	4.95776e+06	5.0674e+06
9.88	505.33	2OH_Asn-BA	L3	Asn-CDCA	0	0	4.37655e+06	3.34698e+06	906984	0
7.2	521.324	3OH_Asn-BA	L3	Asn-CA	0	517190	1.59286e+07	1.1847e+07	0	1.64037e+06
3.6	521.325	3OH_Asn-BA	L3	Asn-ω-MCA	0	0	0	0	1.2017e+07	1.242e+07
3.84	521.325	3OH_Asn-BA	L4	Asn-α-MCA	0	0	0	0	1.00569e+07	1.05193e+07
3.77	521.325	3OH_Asn-BA	L4	Asn-β-MCA	0	0	0	0	3.57932e+06	3.11467e+06
12.43	490.318	1OH_Asp-BA	L4	Asp-LCA	2.20948e+06	0	1.09802e+06	684964	0	0
10.63	506.312	2OH_Asp-BA	L3	Asp-DCA	9.01796e+06	8.51181e+06	7.66298e+06	5.4899e+06	6.13033e+06	5.36613e+06
7.54	522.307	3OH_Asp-BA	L4	Asp-CA	2.54941e+06	2.62171e+06	3.68653e+06	2.50485e+06	0	3.30321e+06
3.93	522.307	3OH_Asp-BA	L4	Asp-ω-MCA	0	0	0	0	1.00987e+07	1.00637e+07
8.31	517.329	1O1OH_Gln-BA	L3		0	0	8.46664e+06	5.83876e+06	0	3.47497e+06
10.05	517.33	1O1OH_Gln-BA	L3		0	0	7.5829e+06	5.72767e+06	0	0
4.76	533.324	1O2OH_Gln-BA	L3		0	0	7.78013e+06	8.46966e+06	0	628529
12.13	503.351	1OH_Gln-BA	L4	Gln-LCA	670340	966602	0	1.50318e+06	0	0
10.45	519.345	2OH_Gln-BA	L3	Gln-DCA	5.42945e+06	5.91448e+06	9.083e+07	6.65892e+07	0	9.65385e+06
7.45	519.345	2OH_Gln-BA	L3		0	0	3.2528e+06	2.43988e+06	0	0
10.02	519.345	2OH_Gln-BA	L4	Gln-CDCA	0	0	8.86071e+06	5.67667e+06	0	0
7.11	519.345	2OH_Gln-BA	L4		0	0	0	0	4.21281e+06	3.95275e+06
7.37	535.34	3OH_Gln-BA	L3	Gln-CA	0	0	3.1736e+07	2.21569e+07	1.75509e+06	1.87646e+06
4.07	535.341	3OH_Gln-BA	L4		0	0	0	0	1.2619e+07	1.21548e+07
9.04	518.313	1O1OH_Glu-BA	L3		1.17776e+06	864697	2.70999e+06	2.04281e+06	0	0
5.22	534.308	1O2OH_Glu-BA	L3		0	0	5.36316e+06	5.45756e+06	0	2.89946e+06
12.52	504.334	1OH_Glu-BA	L4	Glu-LCA	7.77222e+06	7.74554e+06	5.12077e+06	3.80658e+06	3.91412e+06	0
10.76	520.328	2OH_Glu-BA	L3	Glu-DCA	2.75829e+07	2.64466e+07	4.5921e+07	3.10683e+07	2.84146e+07	2.8676e+07
10.65	520.328	2OH_Glu-BA	L3	D-Glu-DCA	4.92991e+06	4.94871e+06	9.67171e+06	6.60108e+06	1.41632e+07	0
10.37	520.328	2OH_Glu-BA	L3	D-Glu-CDCA	0	1.97157e+06	8.25756e+06	6.00733e+06	0	1.61424e+07
8.32	520.328	2OH_Glu-BA	L4		1.72317e+06	713850	3.17598e+06	2.10896e+06	0	0
7.57	520.328	2OH_Glu-BA	L3	Glu-HDCA	0	0	473821	0	1.26756e+07	1.26605e+07
7.69	536.323	3OH_Glu-BA	L3	Glu-CA	2.88701e+06	2.5154e+06	3.02844e+07	2.24953e+07	1.87698e+07	1.8305e+07
3.57	536.324	3OH_Glu-BA	L4		0	0	0	514523	4.01864e+06	4.44317e+06
4.18	536.323	3OH_Glu-BA	L3	Glu-ω-MCA	0	0	0	0	3.20902e+07	3.361e+07
4.59	536.323	3OH_Glu-BA	L3	Glu-α-MCA	0	0	0	0	2.18649e+07	2.06993e+07
4.48	542.324	1O2OH_His-BA	L4		0	0	2.17014e+06	2.45173e+06	0	0
11.9	512.35	1OH_His-BA	L4	His-LCA	764623	572110	0	0	0	0
6.68	528.344	2OH_His-BA	L4		0	0	0	0	4.04014e+06	3.26925e+06
10.23	528.345	2OH_His-BA	L4	His-DCA	5.70202e+06	5.06003e+06	1.68709e+07	1.22364e+07	0	1.12929e+07
7.42	528.344	2OH_His-BA	L4		0	0	547846	276061	0	0
9.73	528.345	2OH_His-BA	L4	His-CDCA	0	0	3.05047e+06	1.96961e+06	0	0
3.75	544.339	3OH_His-BA	L4		0	0	0	0	4.9786e+06	5.0303e+06
7.15	544.34	3OH_His-BA	L3	His-CA	0	0	1.5243e+07	1.13254e+07	0	0
16.18	486.359	1O_Leu/Ile-BA	L4		0	0	0	0	1.53453e+06	1.3991e+06
13.79	502.354	1O1OH_Leu/Ile-BA	L3		1.52151e+06	1.42663e+06	6.61782e+06	6.92116e+06	3.49244e+07	3.22423e+07
12.45	502.355	1O1OH_Leu/Ile-BA	L4		0	0	5.3792e+06	4.1303e+06	1.88225e+06	2.19833e+06
10.66	518.349	1O2OH_Leu/Ile-BA	L3	Ile-7o-HCA	0	0	2.79527e+07	2.05245e+07	0	0
15.89	488.375	1OH_Leu/Ile-BA	L3	Leu-LCA or Ile-LCA	2.73554e+06	2.73603e+06	2.92891e+06	2.7046e+06	1.59031e+07	1.54895e+07
14.88	488.375	1OH_Leu/Ile-BA	L4		711118	706497	0	189246	2.06086e+06	2.18921e+06
15.82	488.375	1OH_Leu/Ile-BA	L4	Ile-LCA	1.71197e+06	1.52375e+06	0	0	0	0
13.89	504.37	2OH_Leu/Ile-BA	L3	Leu-DCA	9.27746e+06	9.06887e+06	6.52003e+07	6.1306e+07	5.07571e+07	4.995e+07
13.79	504.37	2OH_Leu/Ile-BA	L3	Ile-DCA	3.73436e+06	3.51798e+06	6.25711e+06	4.76059e+06	1.23588e+07	1.11617e+07
13.45	504.37	2OH_Leu/Ile-BA	L3	Leu-CDCA	0	756411	9.06826e+06	8.4945e+06	1.0604e+07	1.07141e+07
11.68	504.37	2OH_Leu/Ile-BA	L3		0	0	0	497824	1.68761e+07	1.63532e+07
13.35	504.37	2OH_Leu/Ile-BA	L4	Ile-CDCA	0	0	0	1.95251e+06	2.02189e+06	2.23757e+06
11.77	504.37	2OH_Leu/Ile-BA	L3		0	0	0	0	3.24637e+07	3.25193e+07
12.21	504.37	2OH_Leu/Ile-BA	L4		0	0	2.002e+06	1.03756e+06	0	0
11.34	504.37	2OH_Leu/Ile-BA	L4		0	0	0	0	4.95019e+06	5.82873e+06
9.94	520.364	3OH_Leu/Ile-BA	L3	Leu-ω-MCA	0	0	0	0	5.23156e+07	5.82968e+07
11.78	520.365	3OH_Leu/Ile-BA	L3	Leu-CA	1.60156e+06	1.63047e+06	8.63111e+07	5.94628e+07	2.00388e+07	1.94618e+07
10.26	520.365	3OH_Leu/Ile-BA	L3	Ile-α-MCA or Leu-β-MCA	0	0	2.85915e+06	1.84374e+06	2.21739e+07	0
11.66	520.365	3OH_Leu/Ile-BA	L3	Ile-CA	0	0	1.56326e+07	1.0623e+07	0	0
10.4	520.364	3OH_Leu/Ile-BA	L3	Leu-α-MCA	0	0	0	0	6.03902e+07	6.00419e+07
9.56	520.365	3OH_Leu/Ile-BA	L4		0	0	1.34099e+06	1.00108e+06	0	0
4.63	533.36	1O2OH_Lys-BA	L4		0	0	2.23853e+06	2.68381e+06	0	0
5.42	533.361	1O2OH_Lys-BA	L3		0	0	0	0	3.599e+06	3.39394e+06
10.27	519.381	2OH_Lys-BA	L3	Lys-DCA	1.31082e+07	1.23473e+07	1.38295e+07	9.63689e+06	9.60459e+06	1.18002e+07
11.06	519.381	2OH_Lys-BA	L3	Lys(iso)-DCA	1.76444e+07	1.76632e+07	7.78737e+06	5.65997e+06	0	0
10.7	519.38	2OH_Lys-BA	L4	Lys(iso)-CDCA	0	1.76567e+06	1.45045e+07	1.07335e+07	3.17701e+06	0
7.48	519.381	2OH_Lys-BA	L4	Lys-12-epiDCA	667127	544882	744555	372346	0	0
8.51	519.38	2OH_Lys-BA	L3	Lys(iso)-3β-DCA	2.6541e+06	2.62829e+06	440189	489265	0	0
9.85	519.381	2OH_Lys-BA	L3	Lys-CDCA	1.74128e+06	1.84472e+06	2.1262e+06	1.42118e+06	0	0
8.92	519.381	2OH_Lys-BA	L4	Lys(iso)-12-epiDCA	1.3075e+06	1.3966e+06	0	493286	0	0
6.93	519.381	2OH_Lys-BA	L3		0	0	0	0	8.02718e+06	7.45252e+06
7.21	535.376	3OH_Lys-BA	L3	Lys-CA	2.91962e+06	2.52295e+06	1.43922e+07	1.07401e+07	0	0
8.28	535.376	3OH_Lys-BA	L3	Lys(iso)-CA	5.96437e+06	5.8221e+06	7.9002e+06	5.27136e+06	0	0
4.53	535.376	3OH_Lys-BA	L3	Lys(iso)-ω-MCA	0	0	0	0	6.62521e+06	6.35585e+06
3.15	535.376	3OH_Lys-BA	L4		0	0	0	0	8.3814e+06	8.45638e+06
3.78	535.375	3OH_Lys-BA	L3	Lys-β-MCA	0	0	0	0	1.1565e+07	1.1222e+07
3.88	535.376	3OH_Lys-BA	L3	Lys-α-MCA	0	0	0	0	1.42334e+07	1.48823e+07
3.64	535.376	3OH_Lys-BA	L3	Lys-ω-MCA	0	0	0	0	3.89655e+07	3.9394e+07
5.02	535.376	3OH_Lys-BA	L4	Lys(iso)-α-MCA	0	0	0	0	5.28035e+06	5.65856e+06
12.65	522.326	2OH_Met-BA	L3	Met-DCA	1.03399e+07	9.87822e+06	5.60608e+07	4.43891e+07	1.21497e+07	1.32087e+07
10.6	538.322	3OH_Met-BA	L3	Met-CA	0	0	2.02707e+07	1.35325e+07	0	0
13.6	536.339	1O1OH_Phe-BA	L3	Phe-3o-DCA	0	0	8.08392e+06	7.43002e+06	2.62625e+06	2.69323e+06
12.27	536.339	1O1OH_Phe-BA	L4		0	0	9.55843e+06	7.17467e+06	2.98454e+06	2.624e+06
12.53	536.339	1O1OH_Phe-BA	L3	Phe-12o-DCA	1.57357e+06	1.53997e+06	0	3.08375e+06	4.38659e+06	5.425e+06
10.67	552.334	1O2OH_Phe-BA	L3	Phe-7o-HCA	3.60826e+06	3.29041e+06	4.66608e+07	3.48855e+07	1.07957e+07	1.25344e+07
11.51	552.334	1O2OH_Phe-BA	L4		0	0	3.9589e+06	2.81036e+06	1.89949e+06	1.52061e+06
15.51	522.359	1OH_Phe-BA	L3	Phe-LCA	3.83002e+06	0	2.03447e+06	2.03992e+06	1.01687e+07	1.00525e+07
13.71	538.354	2OH_Phe-BA	L3	Phe-DCA	3.26686e+07	3.08345e+07	1.14266e+08	1.08784e+08	1.02606e+08	9.82638e+07
13.28	538.355	2OH_Phe-BA	L3	Phe-CDCA	3.47266e+06	3.53988e+06	1.66643e+07	1.43228e+07	2.51709e+07	2.36472e+07
12.34	538.355	2OH_Phe-BA	L3	Phe-12-epiDCA or Phe-3β-DCA	0	0	1.05634e+07	7.87554e+06	0	1.33197e+07
11.59	538.354	2OH_Phe-BA	L3	Phe-HDCA	0	0	0	0	4.89146e+07	4.70814e+07
9.79	554.349	3OH_Phe-BA	L3	Phe-ω-MCA	0	0	0	0	1.15497e+08	1.16039e+08
10.07	554.349	3OH_Phe-BA	L3	Phe-β-MCA	0	0	0	0	4.91556e+07	4.61993e+07
11.78	554.349	3OH_Phe-BA	L3	Phe-CA	0	0	1.75285e+08	1.22631e+08	7.51998e+07	7.85058e+07
10.25	554.349	3OH_Phe-BA	L3	Phe-α-MCA	0	1.66023e+06	0	3.53302e+06	1.06988e+08	1.07407e+08
8.56	476.302	1O1OH_Ser-BA	L3		1.56981e+06	1.48371e+06	0	0	0	0
10.66	478.317	2OH_Ser-BA	L3	Ser-DCA	6.26011e+06	6.21661e+06	2.61482e+06	1.91994e+06	7.95919e+06	7.50858e+06
7.42	478.318	2OH_Ser-BA	L3		0	0	0	0	7.51942e+06	6.50277e+06
7.56	494.312	3OH_Ser-BA	L3	Ser-CA	0	0	1.21733e+06	885296	5.70466e+06	5.71609e+06
10.79	490.319	1O1OH_Thr-BA	L4		0	257882	3.68624e+06	2.47713e+06	0	0
9.51	490.318	1O1OH_Thr-BA	L3		0	0	3.41902e+06	2.39465e+06	0	0
5.93	506.313	1O2OH_Thr-BA	L3		0	0	8.17597e+06	7.59246e+06	0	0
11.1	492.333	2OH_Thr-BA	L3	Thr-DCA	6.14683e+06	6.05065e+06	6.58457e+07	4.82505e+07	1.96945e+07	1.90894e+07
10.67	492.333	2OH_Thr-BA	L3	Thr-CDCA	1.17826e+06	1.10508e+06	1.65198e+07	1.28351e+07	1.13901e+07	0
9.08	492.333	2OH_Thr-BA	L4		0	321751	1.80375e+06	1.32701e+06	0	0
7.84	492.333	2OH_Thr-BA	L4		0	0	0	0	7.31945e+06	7.23027e+06
8.66	492.333	2OH_Thr-BA	L3		0	0	2.6013e+06	1.81383e+06	0	0
8.2	508.328	3OH_Thr-BA	L3	Thr-CA	1.60467e+06	1.41495e+06	4.18798e+07	3.18105e+07	5.40669e+06	5.71199e+06
4.43	508.328	3OH_Thr-BA	L3	Thr-ω-MCA	0	0	0	0	1.37947e+07	1.28661e+07
4.92	508.328	3OH_Thr-BA	L4	Thr-α-MCA	0	0	0	0	1.05459e+07	1.10656e+07
10.66	591.344	1O2OH_Trp-BA	L3		0	0	1.4203e+07	1.04294e+07	3.2987e+06	0
15.41	561.371	1OH_Trp-BA	L4	Trp-LCA	2.03747e+06	1.95183e+06	0	172191	0	0
13.63	577.365	2OH_Trp-BA	L3	Trp-DCA	1.80236e+07	1.70825e+07	3.03323e+07	2.72521e+07	1.53277e+07	1.53457e+07
13.24	577.366	2OH_Trp-BA	L3	Trp-CDCA	1.45564e+06	0	5.37805e+06	5.53912e+06	1.19843e+07	1.22939e+07
11.58	577.366	2OH_Trp-BA	L3	Trp-HDCA	0	316236	0	0	1.89383e+07	1.87551e+07
10.14	593.36	3OH_Trp-BA	L3	Trp-β-MCA	0	0	0	0	2.61888e+07	2.54193e+07
10.29	593.36	3OH_Trp-BA	L4	Trp-α-MCA	0	0	0	0	2.89191e+07	2.75453e+07
9.88	593.36	3OH_Trp-BA	L3	Trp-ω-MCA	0	0	0	0	1.7085e+07	1.69265e+07
7.57	568.329	1O2OH_Tyr-BA	L3		0	544754	1.04123e+07	7.73523e+06	0	0
11.91	554.348	2OH_Tyr-BA	L3	Tyr-DCA	0	0	9.52639e+07	6.82478e+07	5.76622e+07	5.33127e+07
11.57	554.35	2OH_Tyr-BA	L3	Tyr-CDCA	4.84777e+06	4.72263e+06	0	5.4156e+06	0	0
10.35	554.348	2OH_Tyr-BA	L4		3.16802e+06	3.24638e+06	0	2.77517e+06	0	0
11.91	554.348	2OH_Tyr-BA	L4	Tyr-DCA	4.86617e+07	4.75111e+07	0	0	0	0
6.79	570.344	3OH_Tyr-BA	L3	Tyr-ω-MCA	0	0	0	0	6.79363e+07	6.97147e+07
7.19	570.344	3OH_Tyr-BA	L3		0	0	0	0	5.69537e+07	5.78676e+07
5.8	570.344	3OH_Tyr-BA	L3		0	0	0	0	1.18413e+07	1.26829e+07
9.83	570.345	3OH_Tyr-BA	L3	Tyr-CA	4.68595e+06	4.8082e+06	4.31307e+07	3.22609e+07	1.55642e+07	1.3987e+07
7.02	570.345	3OH_Tyr-BA	L3		0	0	0	0	1.9283e+07	1.84116e+07
9.37	504.333	1O2OH_Val-BA	L4		0	0	3.39227e+06	2.45651e+06	0	0
9.14	504.333	1O2OH_Val-BA	L4		145494	0	2.44432e+06	1.88852e+06	0	0
13.98	474.359	1OH_Val-BA	L4		0	0	0	0	1.81272e+06	1.75416e+06
15	474.359	1OH_Val-BA	L3	Val-LCA	1.7564e+06	1.8284e+06	0	382650	1.2821e+07	1.22097e+07
12.99	490.354	2OH_Val-BA	L3	Val-DCA	4.73682e+06	4.45993e+06	6.55226e+06	0	2.03009e+07	2.07394e+07
13.12	490.354	2OH_Val-BA	L3		4.78527e+06	4.63048e+06	1.84856e+07	0	6.02481e+06	5.58691e+06
7.74	506.349	3OH_Val-BA	L4		0	0	0	0	1.1597e+07	1.15539e+07
8.05	506.349	3OH_Val-BA	L3	Val-ω-MCA	0	0	0	0	2.96258e+07	2.84143e+07
8.83	506.349	3OH_Val-BA	L3	Val-α-MCA	0	0	0	0	2.11871e+07	2.02579e+07
8.47	506.349	3OH_Val-BA	L3	Val-β-MCA	0	0	0	0	1.22364e+07	1.29901e+07
10.86	506.349	3OH_Val-BA	L3	Val-CA	1.65148e+06	1.61303e+06	1.86735e+07	1.327e+07	2.97427e+06	3.56947e+06
